# Supplementary material for: A Novel In Situ Sol-Gel Synthesis Method for PDMS Composites Reinforced with Silica Nanoparticles
Source: MDPI journal article supplement (doi:10.3390/polym16081125), 2024-04-17
Supplement: s1 [file s1]

## Supplementary Information

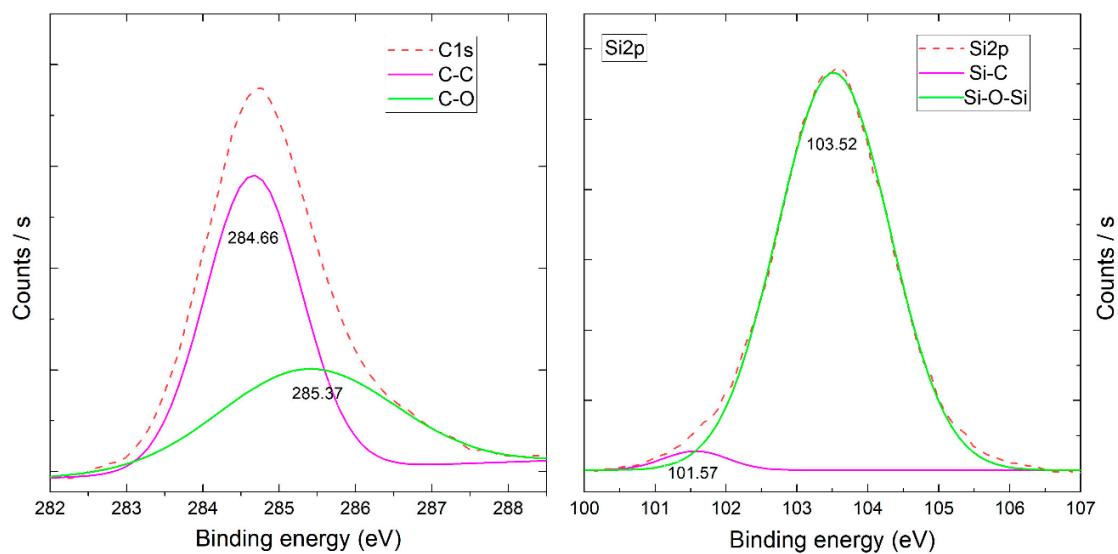

**Figure S1.** Deconvolution analysis for Si2p and C1s orbitals of SiO<sub>2</sub>-a particles.

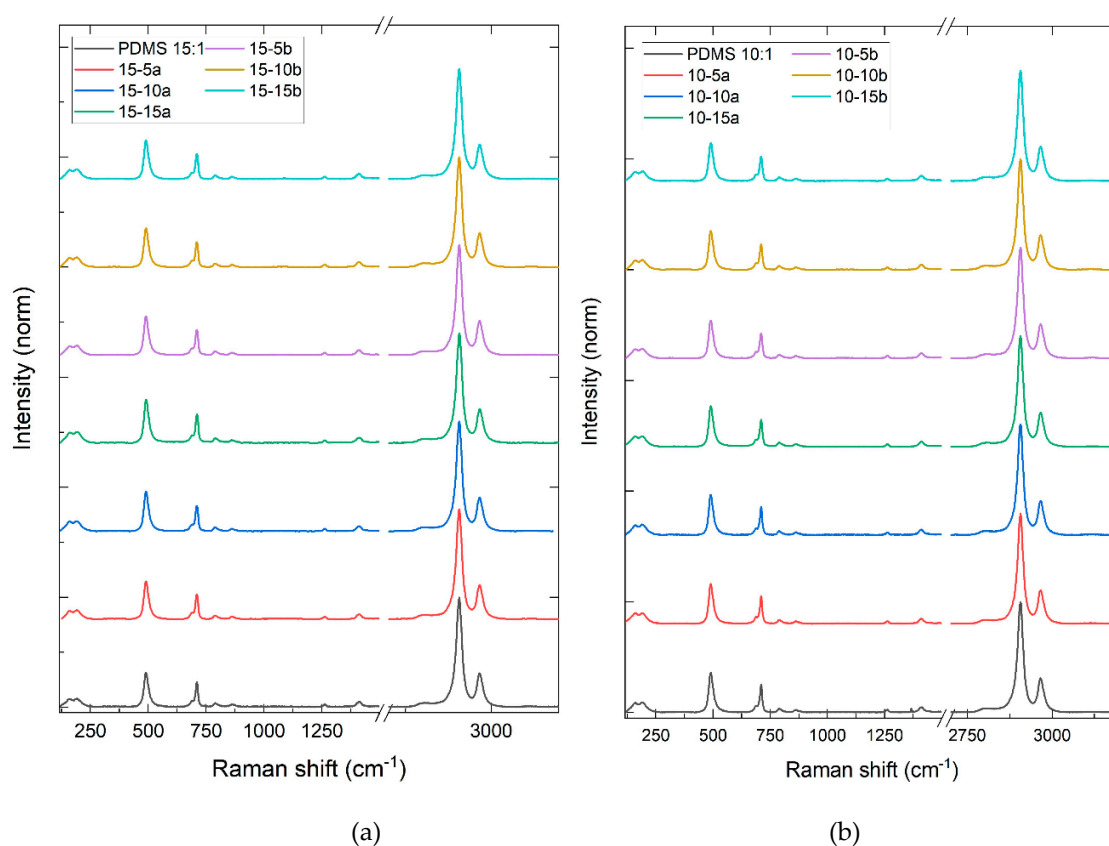

**Figure S2.** Raman spectra of (a) PDMS 15:1 and (b) PDMS 10:1 composite with different NPs SiO<sub>2</sub> concentration (5%, 10% and 15%).

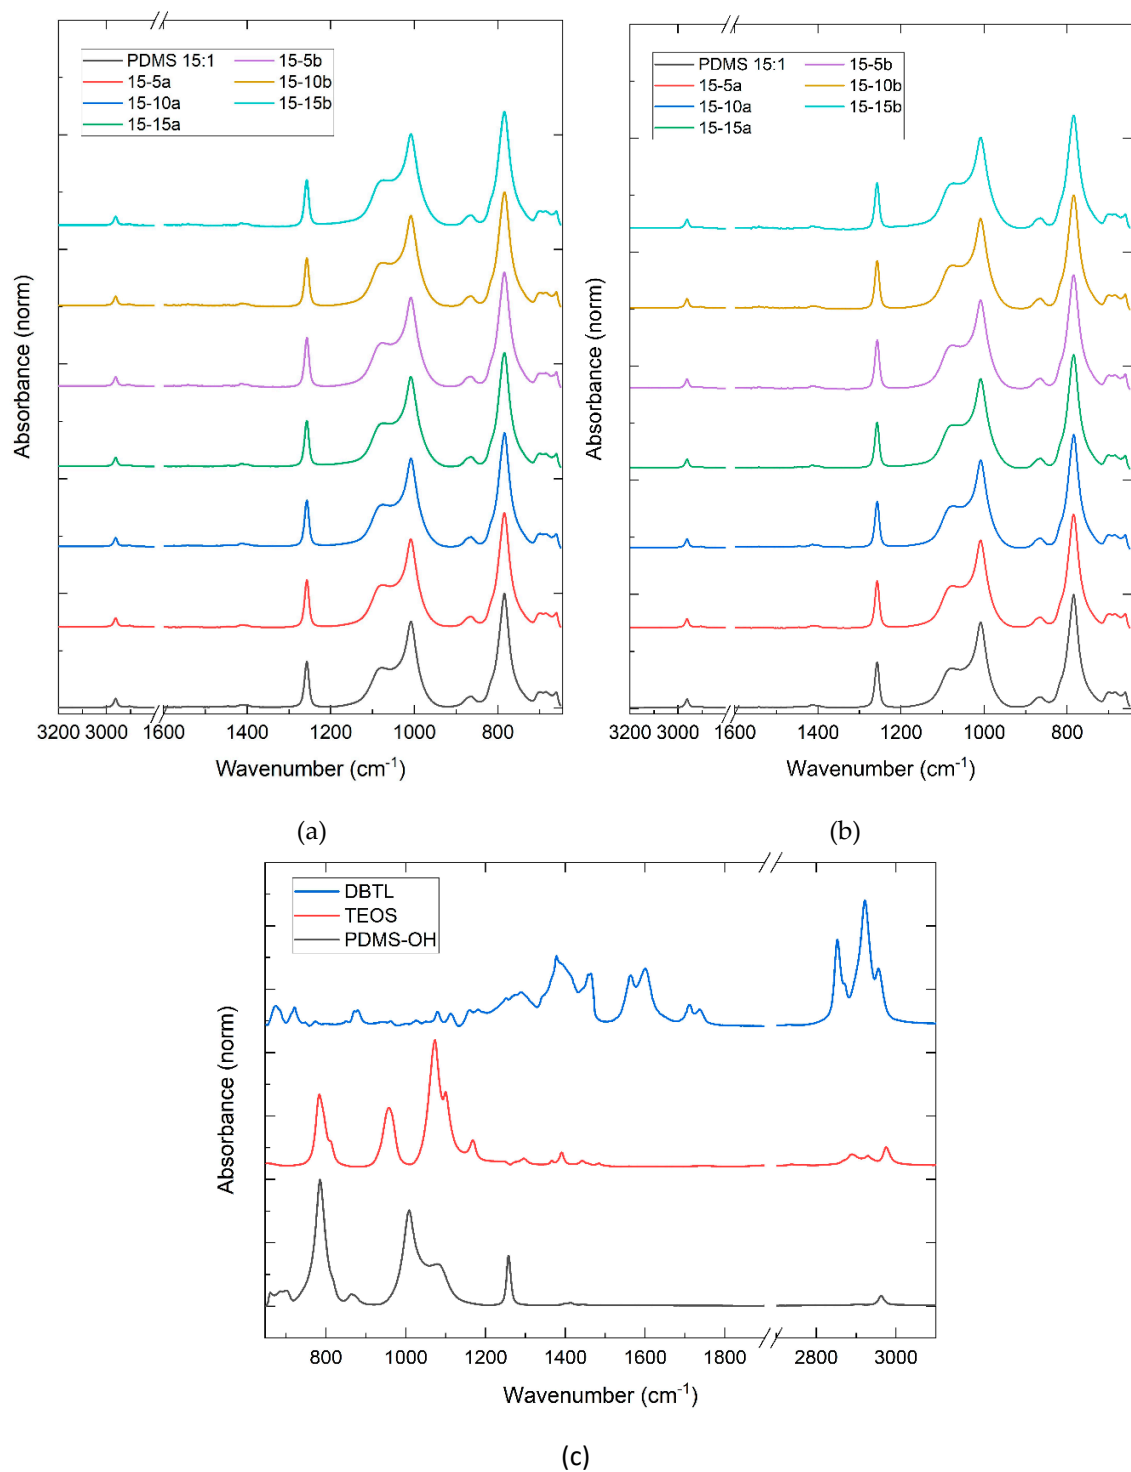

**Figure S3.** FTIR spectra of (a) PDMS 15:1 and (b) PDMS 10:1 composite with different NPs SiO<sub>2</sub> concentration (5%, 10% and 15%). (c) FTIR spectra of principal components of PDMS-SiO<sub>2</sub> composites.

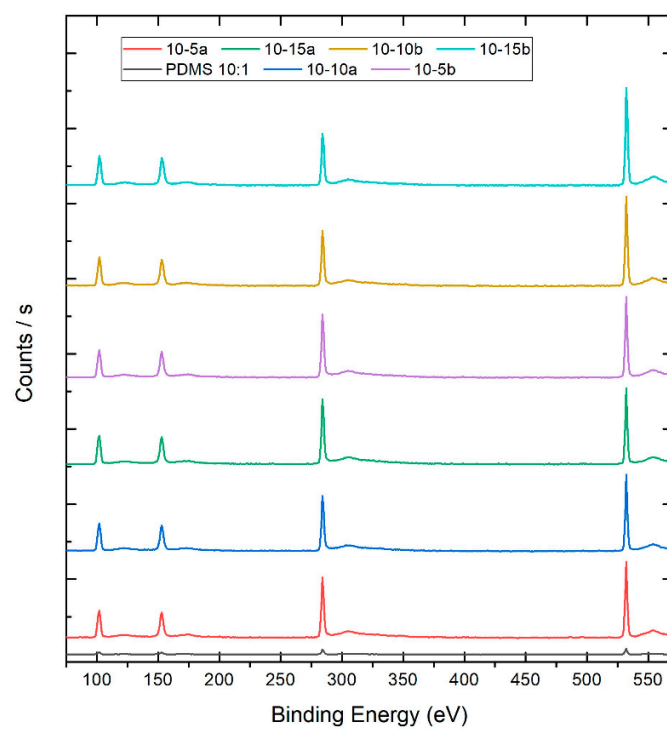

(a)

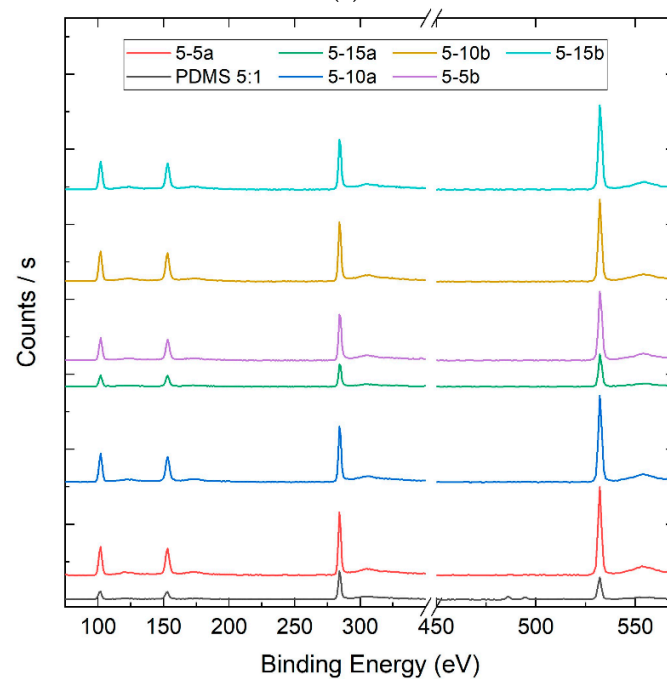

(b)

**Figure S4.** XPS spectra of (a) PDMS 10:1 and (b) PDMS 5:1 composite with different NPs SiO<sub>2</sub> concentration (5%, 10% and 15%).

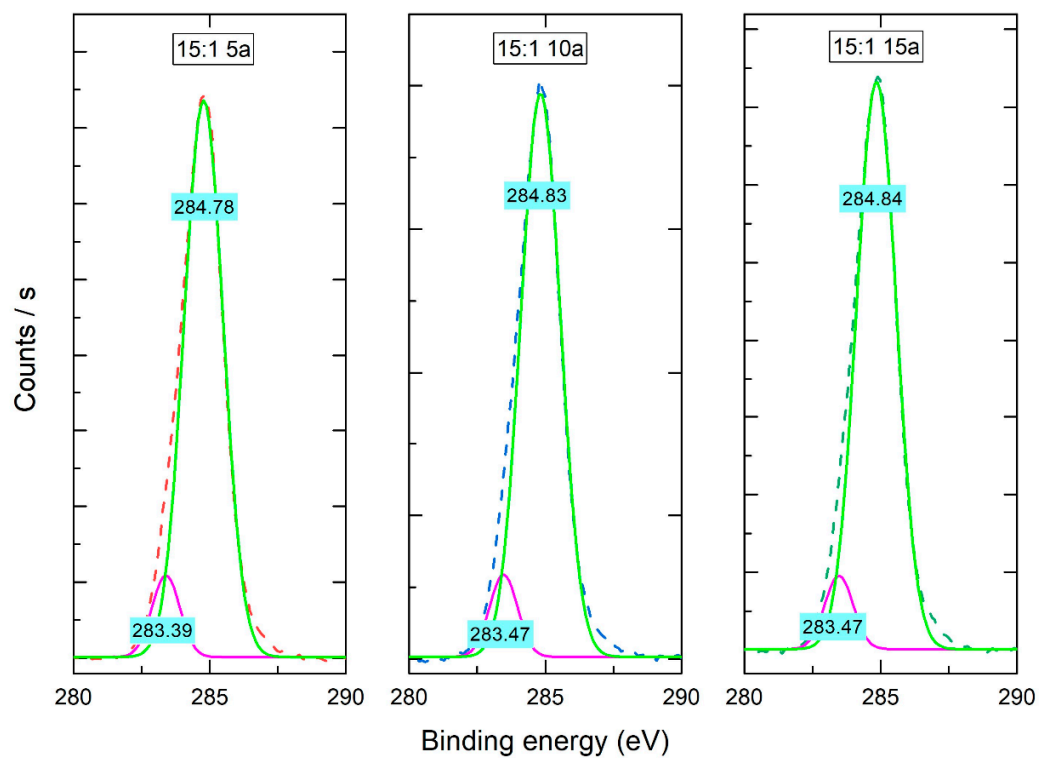

(a)

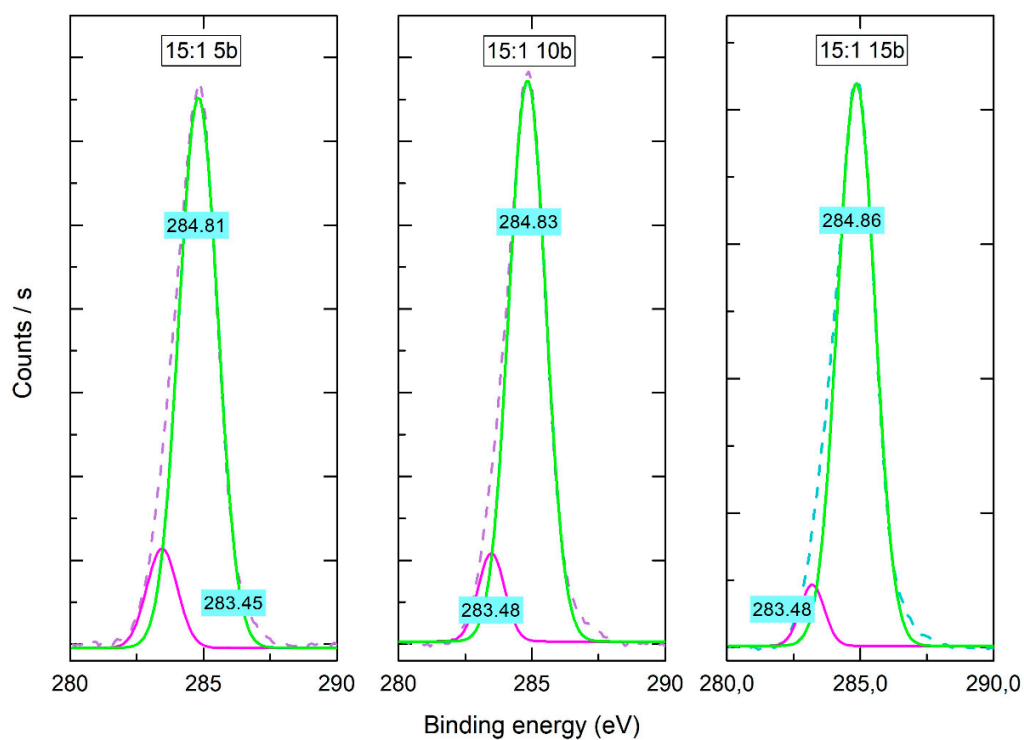

(b)

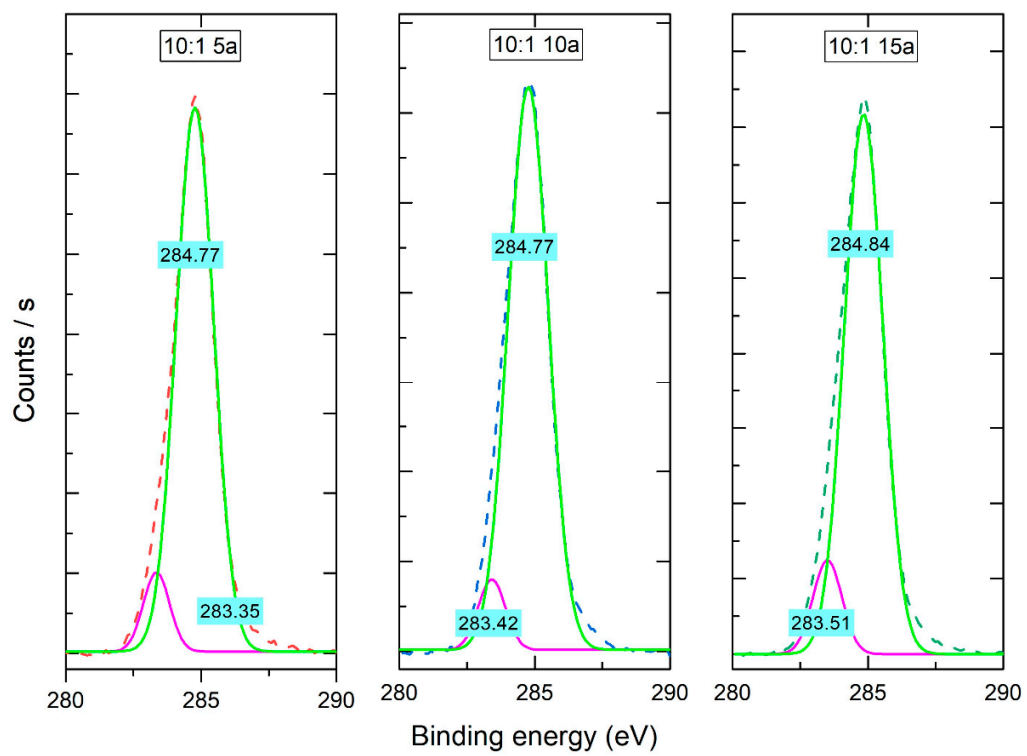

(c)

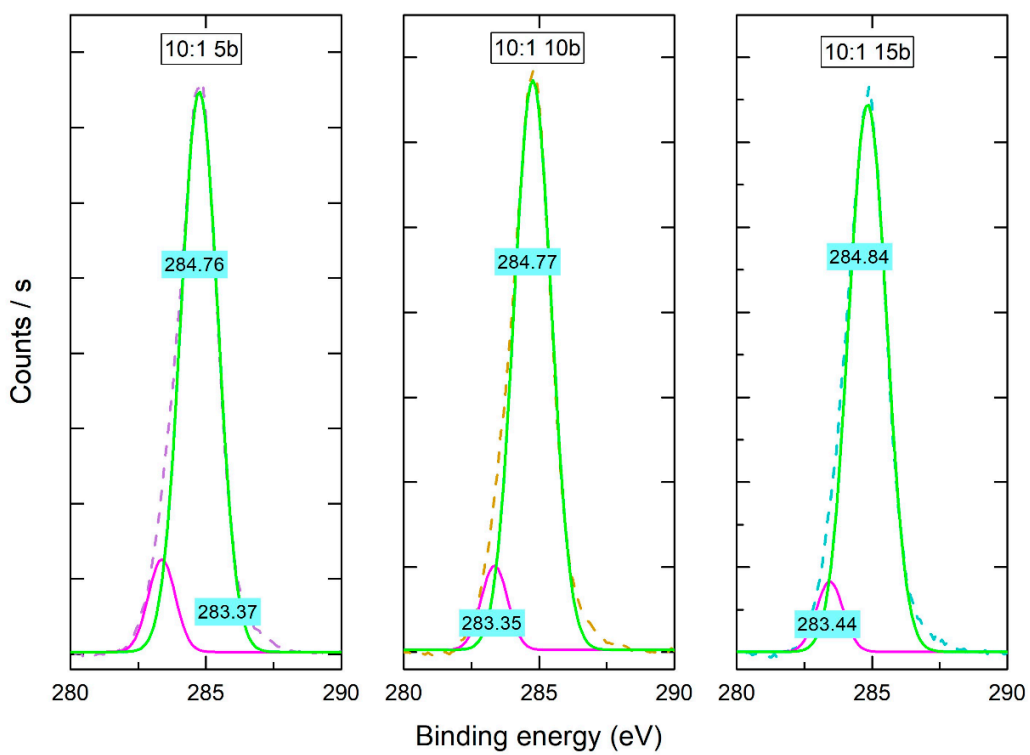

(d)

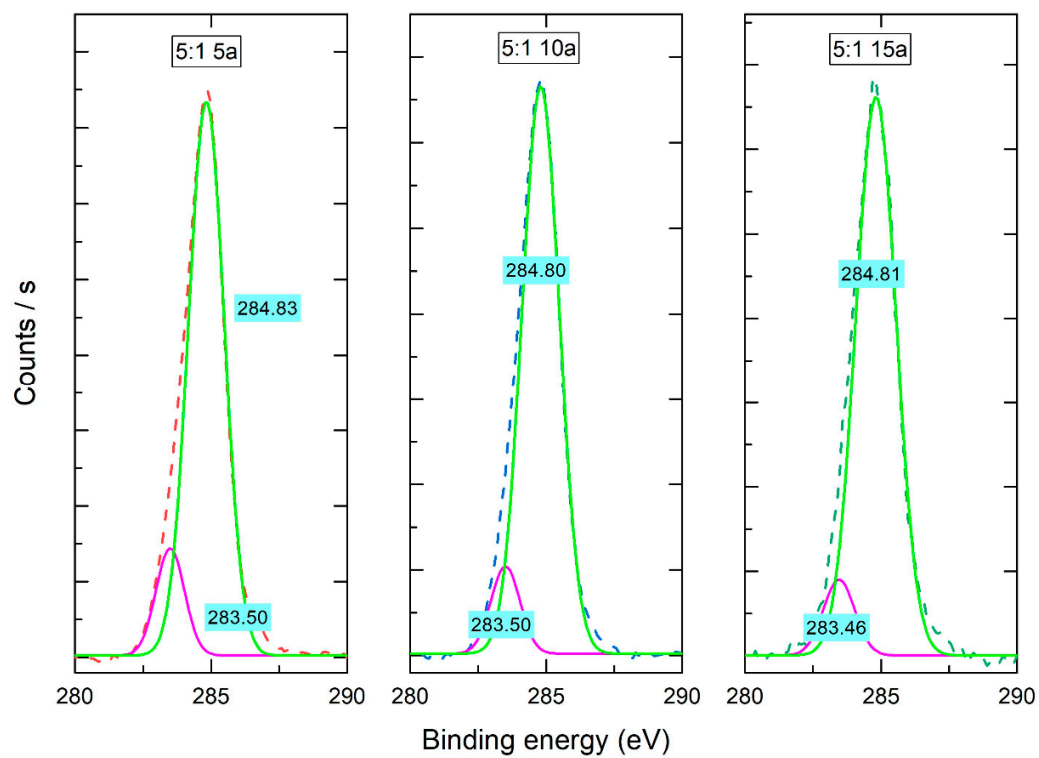

(e)

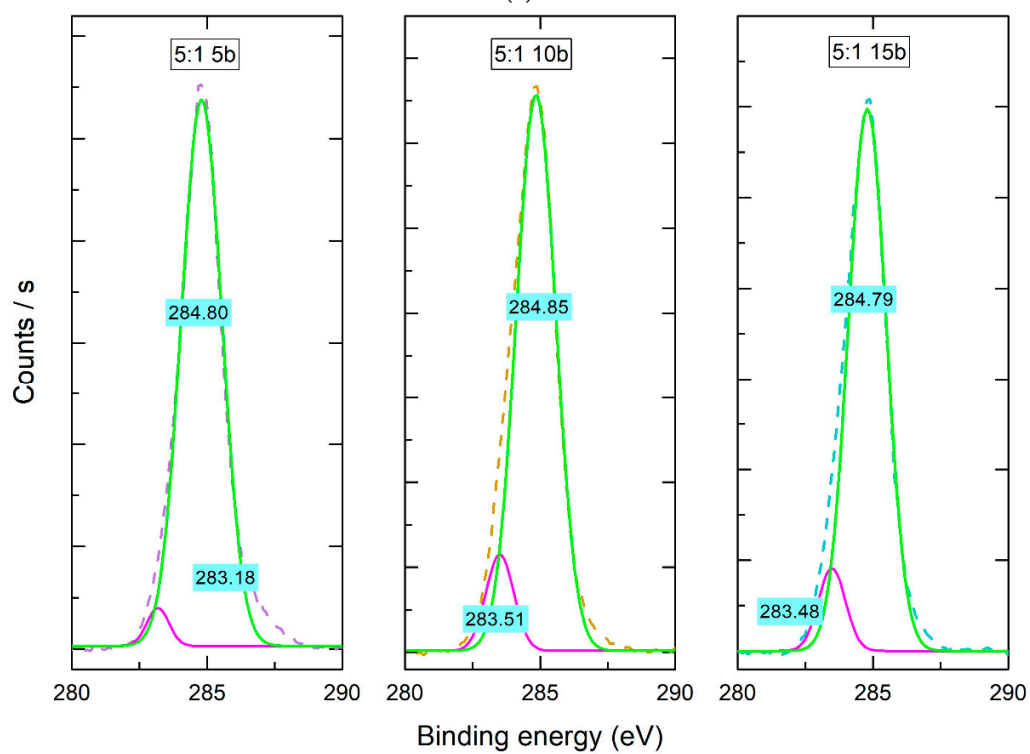

(f)

**Figure S5.** Deconvolution analysis for C1s species of PDMS-%SiO<sub>2</sub> composites: C1s (dash), C-Si (magenta) and C-C (green).

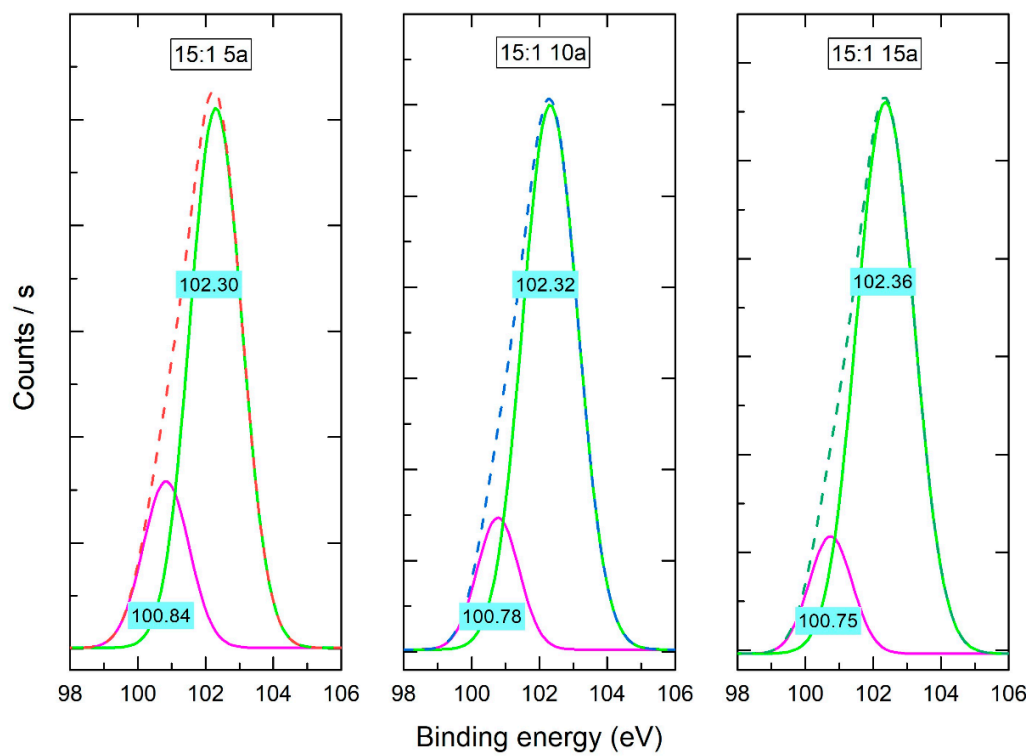

(a)

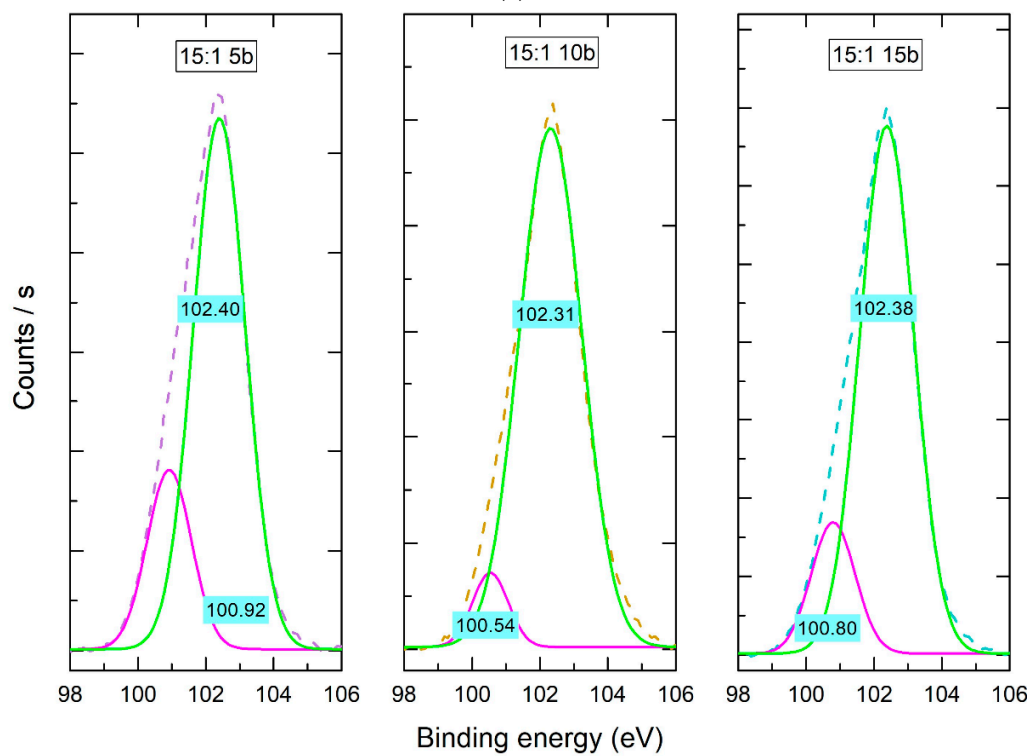

(b)

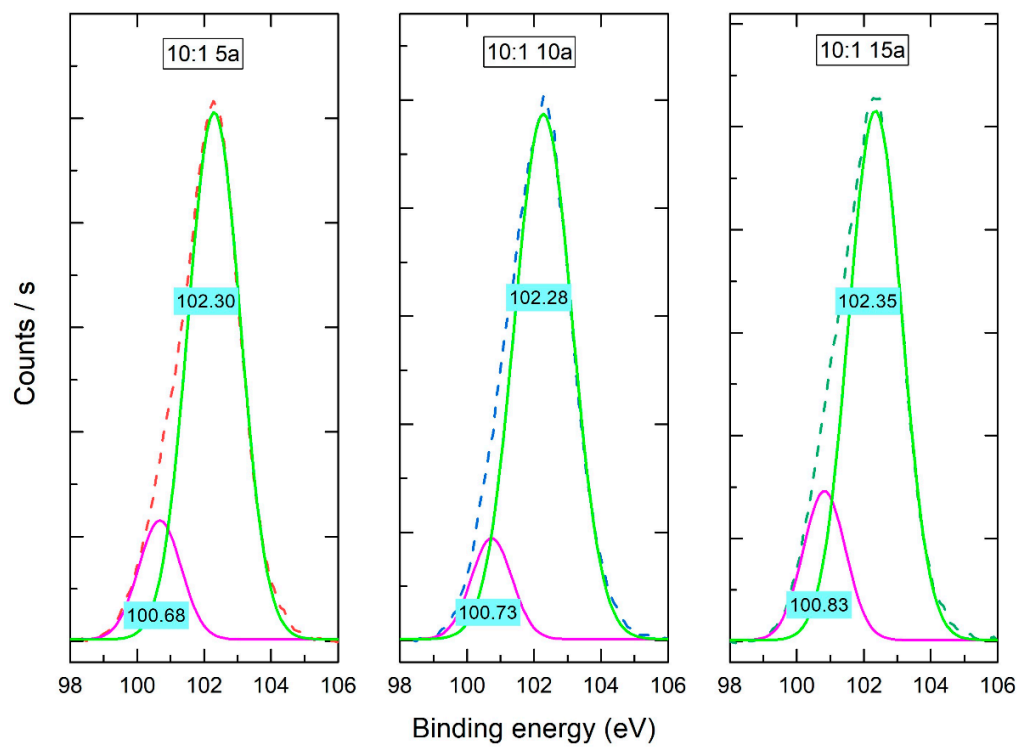

(c)

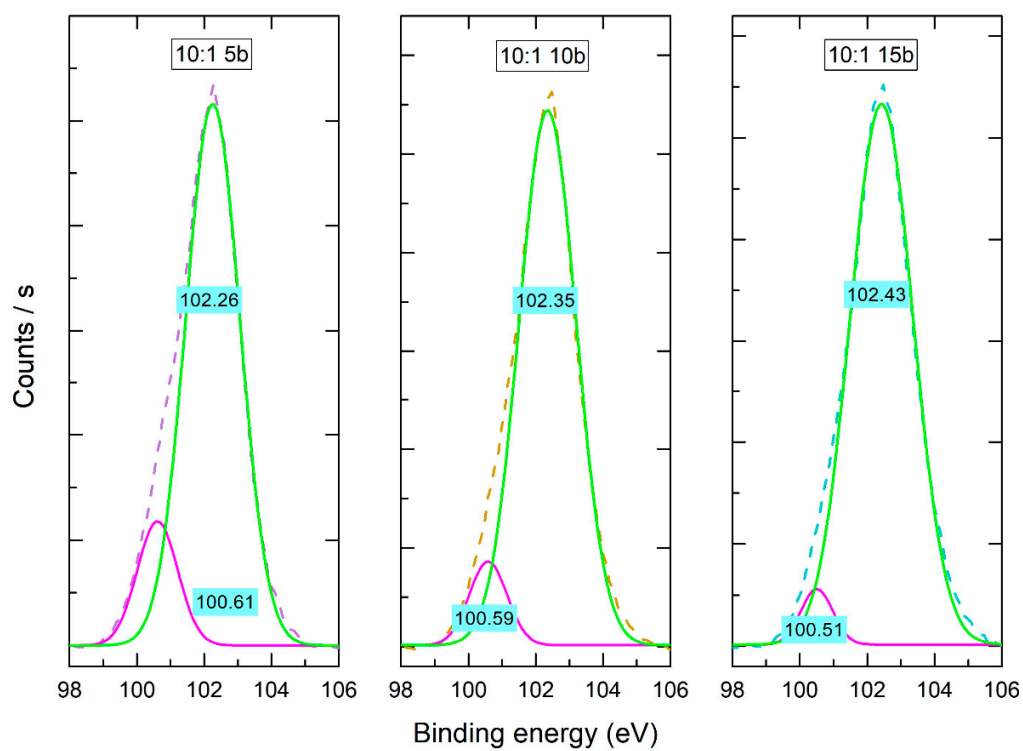

(d)



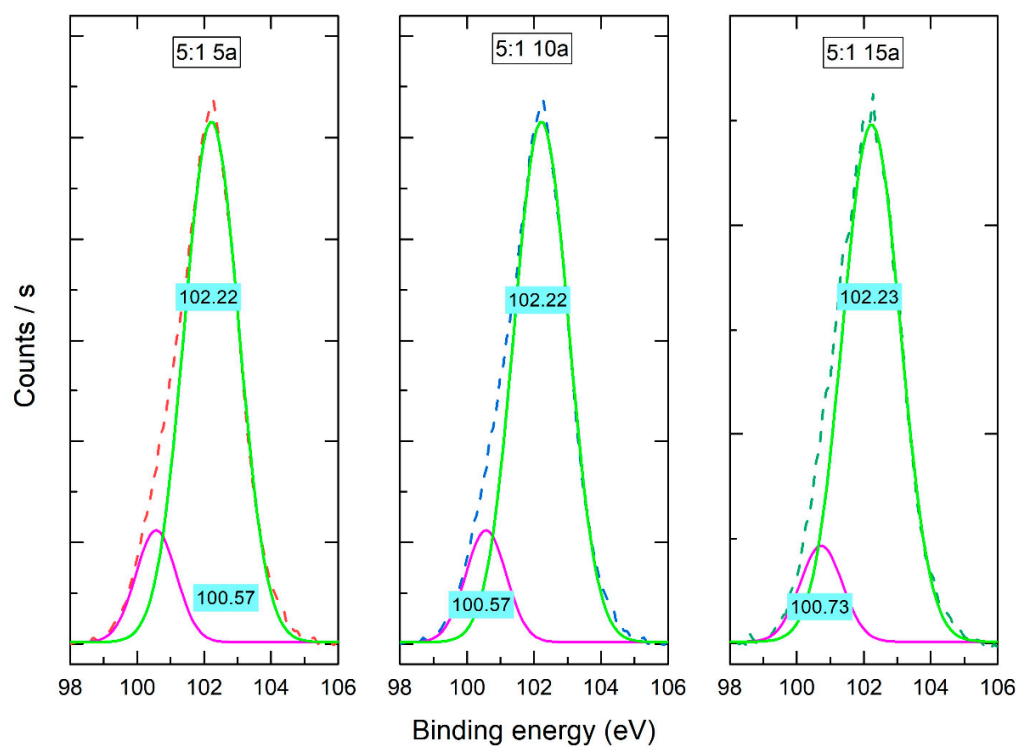

(e)

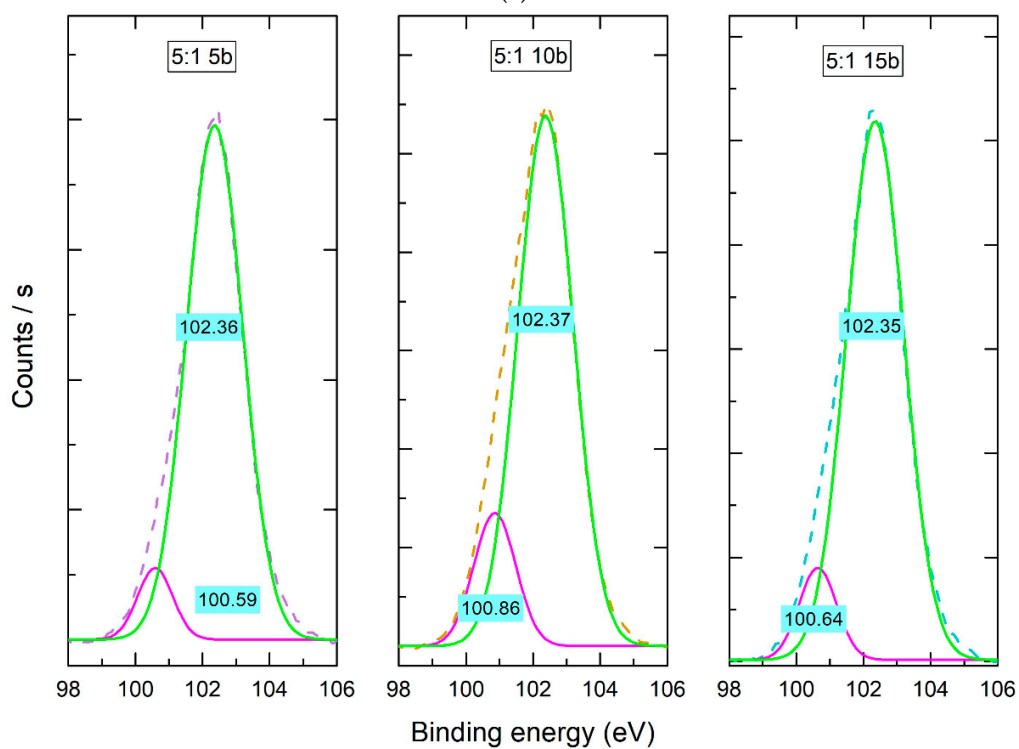

(f)

**Figure S6.** Deconvolution analysis for Si<sub>2</sub>p species of PDMS-%SiO<sub>2</sub> composites: Si<sub>2</sub>p (dash), Si-C (magenta) and O-Si-O (green).
